# Supplementary material
Source: publisher figshare collection journal article supplement (https://karger.figshare.com/articles/dataset/_/16657477)
Supplement: Supplementary file 1 [file 1]

**Figure 2 (online suppl.) Sample ECG trace with and without Artefact**

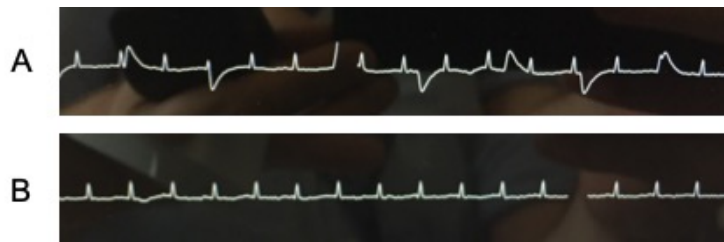

Screenshot of the ECG trace of the ICON non-invasive cardiac output monitor (Osypka Medical, Berlin, Germany) A: with artefact, Signal Quality 30% B: after uncoupling from energy supply Signal Quality 100%
