# Supplementary material
Source: publisher figshare collection journal article supplement (https://karger.figshare.com/articles/dataset/_/16657477)
Supplement: Supplementary file 2 [file 1]

**Figure 1 (online suppl.) Electrical Cardiometry Sensor placement**

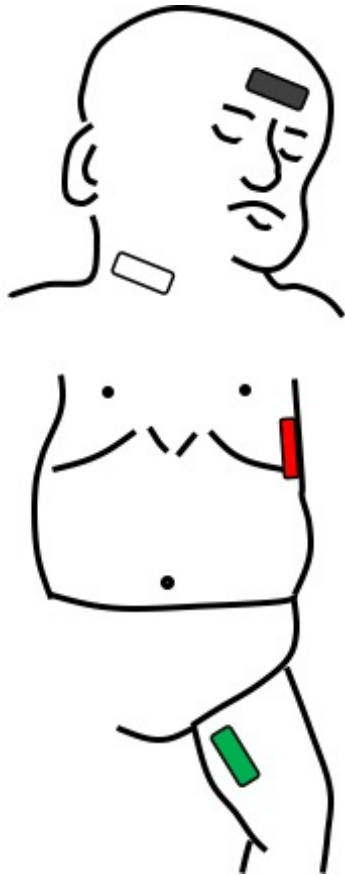

Sensor application in Electrical Cardiometry monitoring as currently recommended by the manufacturers. Electrical current is applied through the outer electrodes (black/green) and measured through the inner electrodes (white/red).
